# Supplementary material for: A magnetic and highly reusable macroporous superhydrophobic/superoleophilic PDMS/MWNT nanocomposite for oil sorption from water
Source: Royal Society of Chemistry journal article supplement (doi:10.1039/c5ta04353k), 2015-01-01
Supplement: c5ta04353k1.pdf [file c5ta04353k1.pdf]

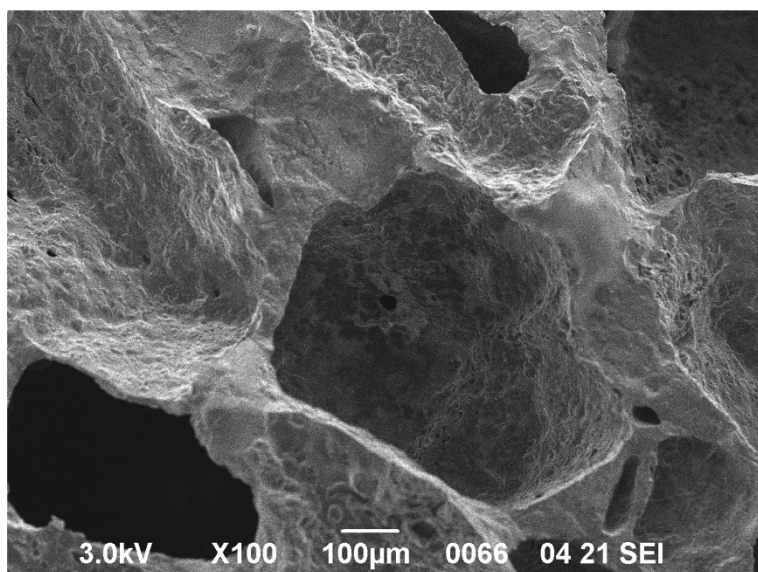

**Figure S1** SEM image of porous PDMS-MWNTs with the size of GMps equal to  $620 \pm 100 \mu\text{m}$

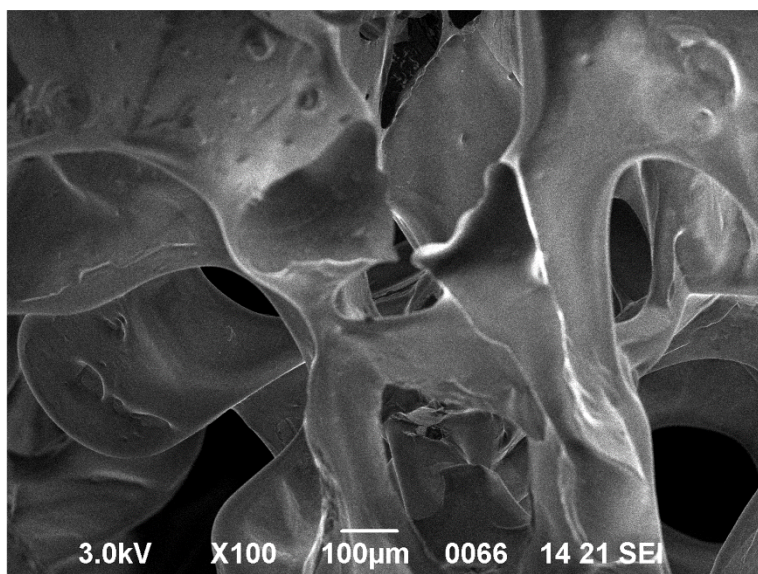

**Figure S2** SEM image of porous PDMS with the size of GMps equal to  $620 \pm 100 \mu\text{m}$
